# Supplementary material for: Molecular Characterization of Staphylococci Recovered from Hospital Personnel and Frequently Touched Surfaces in Tianjin, China
Source: Hindawi journal article supplement (doi:10.1155/2022/1061387), 2022-08-10
Supplement: f1 [file 1061387.f1.zip]

Table S2 Antimicrobial susceptibility and molecular characterization of staphylococci that were recovered from frequently touched surfaces

1

| No | dept | sites                | ID                     | C | CD | CN | CPT | E | FOX | LEV | LZD | PG | T | TEC | <i>mecA</i> | SCCmec | MLST |
|----|------|----------------------|------------------------|---|----|----|-----|---|-----|-----|-----|----|---|-----|-------------|--------|------|
| 1  | CT   | registration machine | <i>S. capitis</i>      | I | S  | S  | I   | I | R   | R   | R   | S  | R | S   | +           | SCC    | -    |
| 2  | OC   | door handle          | <i>S. epidermidis</i>  | R | I  | R  | S   | R | R   | I   | S   | R  | S | S   | +           | II     | 17   |
| 3  | OC   | door handle          | <i>S. epidermidis</i>  | S | S  | R  | S   | I | R   | R   | S   | S  | S | S   | +           | IV     | 4    |
| 4  | ND   | door handle          | <i>S. epidermidis</i>  | I | S  | S  | S   | I | R   | S   | S   | S  | S | S   | +           | IV     | 4    |
| 5  | LG   | door handle          | <i>S. epidermidis</i>  | S | I  | R  | I   | R | R   | S   | S   | R  | S | R   | +           | IV     | 6    |
| 6  | ENT  | door handle          | <i>S. epidermidis</i>  | S | S  | R  | S   | R | R   | S   | S   | R  | S | R   | +           | IV     | 17   |
| 7  | ND   | door handle          | <i>S. epidermidis</i>  | S | R  | S  | S   | R | R   | S   | S   | S  | S | S   | +           | IV     | 59   |
| 8  | OC   | door handle          | <i>S. epidermidis</i>  | S | S  | S  | S   | S | R   | S   | S   | S  | S | S   | +           | IV     | 344  |
| 9  | DM   | door handle          | <i>S. epidermidis</i>  | S | S  | R  | S   | R | R   | R   | S   | R  | S | S   | +           | V      | 210  |
| 10 | SD   | door handle          | <i>S. epidermidis</i>  | S | S  | S  | S   | R | R   | R   | S   | R  | S | I   | +           | V      | 210  |
| 11 | ND   | door handle          | <i>S. epidermidis</i>  | S | S  | S  | S   | R | R   | S   | S   | S  | S | S   | +           | V      | 337  |
| 12 | OC   | door handle          | <i>S. epidermidis</i>  | S | S  | R  | S   | S | R   | S   | S   | R  | S | S   | +           | A/1    | 916  |
| 13 | CL   | report machine       | <i>S. epidermidis</i>  | S | S  | S  | S   | R | R   | S   | S   | R  | S | I   | +           | B/5    | 374  |
| 14 | DM   | door handle          | <i>S. epidermidis</i>  | S | I  | R  | S   | R | R   | S   | S   | R  | S | I   | +           | C/1    | 878  |
| 15 | CT   | registration machine | <i>S. epidermidis</i>  | S | S  | S  | S   | R | R   | S   | S   | R  | S | S   | +           | C/2    | 218  |
| 16 | ENT  | door handle          | <i>S. epidermidis</i>  | S | S  | S  | S   | R | R   | S   | S   | R  | S | S   | +           | C/2    | 826  |
| 17 | SD   | door handle          | <i>S. epidermidis</i>  | S | I  | S  | S   | S | R   | S   | S   | R  | S | I   | +           | SCC    | 200  |
| 18 | LG   | door handle          | <i>S. epidermidis</i>  | S | S  | S  | S   | S | R   | S   | S   | R  | S | S   | +           | SCC    | 325  |
| 19 | IM   | door handle          | <i>S. epidermidis</i>  | S | S  | S  | S   | R | R   | S   | S   | R  | S | S   | +           | SCC    | 788  |
| 20 | DM   | checking bed         | <i>S. haemolyticus</i> | S | S  | S  | S   | R | R   | I   | S   | S  | S | S   | +           | II     | -    |
| 21 | OT   | door handle          | <i>S. haemolyticus</i> | R | R  | R  | I   | R | R   | I   | S   | R  | R | I   | +           | V      | -    |





|    |     |                    |                         |   |   |   |   |   |   |   |   |   |   |   |   |   |   |
|----|-----|--------------------|-------------------------|---|---|---|---|---|---|---|---|---|---|---|---|---|---|
| 70 | PD  | door handle        | <i>S. hominis</i>       | R | R | S | S | R | S | S | S | S | R | S | - | - | - |
| 71 | SD  | door handle        | <i>S. hominis</i>       | S | S | S | S | R | S | S | S | R | S | I | - | - | - |
| 72 | NS  | checking bed       | <i>S. hominis</i>       | S | S | S | S | R | S | S | S | S | S | S | - | - | - |
| 73 | LG  | checking bed       | <i>S. pasteurii</i>     | S | S | S | S | S | S | S | S | S | S | S | - | - | - |
| 74 | IM  | door handle        | <i>S. pettenkoferi</i>  | S | S | S | S | S | S | S | S | S | S | S | - | - | - |
| 75 | PD  | door handle        | <i>S. saprophyticus</i> | S | I | S | S | I | S | S | S | R | R | I | - | - | - |
| 76 | SD  | checking equipment | <i>S. saprophyticus</i> | S | I | S | S | I | S | S | S | R | S | I |   | - | - |
| 77 | OT  | call button        | <i>S. succinus</i>      | S | S | R | S | S | S | S | S | S | S | I | - | - | - |
| 78 | CM  | door handle        | <i>S. warneri</i>       | R | S | R | S | R | S | S | S | S | S | I | - | - | - |
| 79 | CM  | door handle        | <i>S. warneri</i>       | R | S | R | S | R | S | S | S | S | S | R | - | - | - |
| 80 | CM  | door handle        | <i>S. warneri</i>       | R | R | R | S | R | S | S | S | S | S | I | - | - | - |
| 81 | CM  | door handle        | <i>S. warneri</i>       | R | S | R | S | R | S | S | S | S | S | I | - | - | - |
| 82 | CT  | water tap          | <i>S. warneri</i>       | S | S | S | S | S | S | S | S | S | S | R | - | - | - |
| 83 | CT  | water tap          | <i>S. warneri</i>       | S | S | S | S | S | S | S | S | S | I | R | - | - | - |
| 84 | ENT | door handle        | <i>S. warneri</i>       | S | I | R | S | R | S | S | S | S | S | I | - | - | - |
| 85 | PD  | water tap          | <i>S. warneri</i>       | S | S | R | S | R | S | S | S | S | S | I | - | - | - |
| 86 | NS  | water tap          | <i>S. warneri</i>       | S | I | R | S | R | S | S | S | S | S | I | - | - | - |

Note: AR: anorectal surgery, CL: clinical lab, CM: Chinese medicine department, CT: Chest disease department, DG: digestion medicine, DM: dermatology department, ED: endocrine department, ENT: E.N.T. department, ER: emergency room, IM: ultrasonic department, LG: liver and gall surgical department, ND: neurology department, OC: oncology department, OT: orthopaedics department, PD: pediatric department, SD: stomatology department, NS: neurosurgery; GT: gastroenterology, MD: medicine department; C: chloramphenicol, CD: clindamycin, CN: gentamicin, CPT: ceftaroline, E: erythromycin, FOX: cefoxitin, LEV: levofloxacin, LZD: linezolid, PG: penicillin, T: tetracycline, TEC: teicoplanin

2

3

4

5

6

7
