# Supplementary material for: Molecular Characterization of Staphylococci Recovered from Hospital Personnel and Frequently Touched Surfaces in Tianjin, China
Source: Hindawi journal article supplement (doi:10.1155/2022/1061387), 2022-08-10
Supplement: f1 [file 1061387.f1.zip]

Table S1 Antimicrobial susceptibility and molecular characterization of staphylococci that were recovered from hospital personnel

1

| No. | sites | Dept | ID                   | C | CD | CN | CPT | E | FOX | LEV | LZD | PG | T | TEC | <i>mecA</i> | <i>SCCmec</i> | MLST |
|-----|-------|------|----------------------|---|----|----|-----|---|-----|-----|-----|----|---|-----|-------------|---------------|------|
| 1   | H     | OT   | <i>S.cohnii</i>      | S | R  | S  | S   | R | R   | S   | S   | R  | S | I   | +           | A/1           | -    |
| 2   | NC    | TS   | <i>S.epidermidis</i> | S | I  | S  | S   | I | R   | S   | S   | R  | S | I   | +           | I             | 59   |
| 3   | NC    | IM   | <i>S.epidermidis</i> | S | R  | S  | S   | I | R   | S   | S   | R  | S | S   | +           | I             | 59   |
| 4   | NC    | DM   | <i>S.epidermidis</i> | S | I  | I  | S   | R | R   | R   | S   | R  | S | I   | +           | I             | 89   |
| 5   | H     | CM   | <i>S.epidermidis</i> | S | S  | S  | S   | R | R   | S   | S   | R  | R | R   | +           | I             | 247  |
| 6   | H     | CM   | <i>S.epidermidis</i> | R | S  | R  | S   | R | R   | R   | S   | R  | S | I   | +           | I             | 291  |
| 7   | NC    | DM   | <i>S.epidermidis</i> | R | S  | I  | S   | R | R   | I   | S   | R  | S | S   | +           | I             | 840* |
| 8   | H     | RH   | <i>S.epidermidis</i> | R | I  | S  | S   | R | R   | S   | S   | R  | S | I   | +           | II            | 200  |
| 9   | NC    | OT   | <i>S.epidermidis</i> | R | S  | S  | S   | R | R   | R   | S   | R  | S | I   | +           | II            | 251  |
| 10  | NC    | ER   | <i>S.epidermidis</i> | S | I  | S  | S   | R | R   | S   | S   | R  | S | S   | +           | IV            | 35   |
| 11  | NC    | ER   | <i>S.epidermidis</i> | S | R  | S  | S   | I | R   | S   | S   | R  | S | I   | +           | IV            | 59   |
| 12  | H     | ER   | <i>S.epidermidis</i> | S | R  | S  | S   | I | R   | S   | S   | R  | S | I   | +           | IV            | 59   |
| 13  | NC    | OT   | <i>S.epidermidis</i> | S | I  | S  | S   | S | R   | S   | S   | R  | S | I   | +           | IV            | 59   |
| 14  | H     | RH   | <i>S.epidermidis</i> | S | I  | S  | S   | S | R   | S   | S   | R  | S | I   | +           | IV            | 59   |
| 15  | NC    | ER   | <i>S.epidermidis</i> | S | S  | S  | S   | S | R   | R   | S   | R  | S | R   | +           | IV            | 89   |
| 16  | NC    | ER   | <i>S.epidermidis</i> | S | S  | S  | S   | R | R   | R   | S   | R  | S | I   | +           | V             | 20   |
| 17  | H     | TS   | <i>S.epidermidis</i> | S | I  | S  | S   | R | R   | S   | S   | R  | S | I   | +           | V             | 35   |
| 18  | NC    | ER   | <i>S.epidermidis</i> | S | S  | I  | S   | R | R   | S   | S   | R  | S | S   | +           | V             | 35   |
| 19  | NC    | CM   | <i>S.epidermidis</i> | S | I  | S  | S   | R | R   | R   | S   | R  | S | I   | +           | V             | 89   |
| 20  | NC    | ER   | <i>S.epidermidis</i> | S | S  | S  | S   | S | R   | S   | S   | R  | S | I   | +           | V             | 89   |
| 21  | NC    | ER   | <i>S.epidermidis</i> | S | R  | S  | S   | R | R   | S   | S   | R  | S | S   | +           | V             | 89   |
| 22  | NC    | ER   | <i>S.epidermidis</i> | S | R  | S  | S   | R | R   | R   | S   | R  | R | S   | +           | V             | 89   |

|    |    |     |                      |   |   |   |   |   |   |   |   |   |   |   |   |                       |      |
|----|----|-----|----------------------|---|---|---|---|---|---|---|---|---|---|---|---|-----------------------|------|
| 23 | NC | ER  | <i>S.epidermidis</i> | S | S | S | S | S | R | R | S | R | S | S | + | V                     | 152  |
| 24 | NC | ER  | <i>S.epidermidis</i> | S | R | S | S | R | R | S | S | R | S | I | + | V                     | 192  |
| 25 | NC | ER  | <i>S.epidermidis</i> | S | S | S | S | R | R | S | S | R | S | I | + | V                     | 192  |
| 26 | NC | DM  | <i>S.epidermidis</i> | S | S | S | S | R | R | R | S | R | S | I | + | V                     | 210  |
| 27 | NC | ER  | <i>S.epidermidis</i> | S | R | S | S | R | R | R | S | R | S | I | + | V                     | 210  |
| 28 | H  | ED  | <i>S.epidermidis</i> | S | I | S | S | I | R | S | S | R | S | I | + | V                     | 454  |
| 29 | H  | ED  | <i>S.epidermidis</i> | S | S | S | S | R | R | S | S | R | S | I | + | V                     | 841* |
| 30 | NC | IM  | <i>S.epidermidis</i> | S | S | S | S | R | R | S | S | R | S | I | + | V                     | 842* |
| 31 | NC | ER  | <i>S.epidermidis</i> | R | I | R | S | S | R | R | S | R | S | I | + | IX                    | 5    |
| 32 | H  | ER  | <i>S.epidermidis</i> | R | S | S | S | S | R | I | S | R | S | I | + | IX                    | 235  |
| 33 | H  | OT  | <i>S.epidermidis</i> | S | R | S | R | R | R | S | S | R | S | S | + | A/1                   | 249  |
| 34 | NC | DM  | <i>S.epidermidis</i> | S | I | R | S | R | R | S | S | R | R | S | + | B/5                   | 59   |
| 35 | NC | DM  | <i>S.epidermidis</i> | R | S | S | S | I | R | R | S | R | R | I | + | B/5                   | 235  |
| 36 | NC | ER  | <i>S.epidermidis</i> | I | R | S | I | I | R | S | S | R | S | S | + | C/2                   | 59   |
| 37 | NC | ER  | <i>S.epidermidis</i> | R | S | S | S | I | R | I | S | R | S | I | + | C/2                   | 235  |
| 38 | NC | ER  | <i>S.epidermidis</i> | R | R | R | S | I | R | S | S | R | R | I | + | SCC                   | 59   |
| 39 | NC | OT  | <i>S.epidermidis</i> | S | S | S | S | R | R | S | S | R | S | I | + | SCC                   | 132  |
| 40 | NC | OT  | <i>S.epidermidis</i> | R | I | S | S | R | R | S | S | R | S | R | + | Pseudo ( $\psi$ ) SCC | 173  |
| 41 | H  | ED  | <i>S.hominis</i>     | S | R | S | S | R | R | S | S | R | S | S | + | A/1                   | -    |
| 42 | H  | MEC | <i>S.hominis</i>     | S | R | S | R | R | R | S | S | S | R | I | + | A/5                   | -    |
| 43 | H  | TS  | <i>S.hominis</i>     | S | I | S | S | S | R | S | S | R | S | S | + | I                     | -    |
| 44 | H  | ED  | <i>S.hominis</i>     | R | I | S | R | R | R | S | S | S | S | S | + | I                     | -    |
| 45 | H  | OT  | <i>S.hominis</i>     | R | R | S | I | R | R | S | S | R | S | S | + | I                     | -    |
| 46 | H  | MEC | <i>S.hominis</i>     | S | I | S | S | R | R | S | S | S | S | S | + | II                    | -    |

|    |    |     |                      |   |   |   |   |   |   |   |   |   |   |   |   |     |   |
|----|----|-----|----------------------|---|---|---|---|---|---|---|---|---|---|---|---|-----|---|
| 47 | H  | MEC | <i>S.hominis</i>     | S | S | S | S | R | R | S | S | S | R | S | + | II  | - |
| 48 | H  | MEC | <i>S.hominis</i>     | S | S | S | S | R | R | S | S | S | S | S | + | II  | - |
| 49 | H  | MEC | <i>S.hominis</i>     | R | S | S | S | R | R | I | S | S | R | S | + | II  | - |
| 50 | H  | MEC | <i>S.hominis</i>     | S | S | S | S | R | R | S | S | R | S | S | + | II  | - |
| 51 | H  | OT  | <i>S.hominis</i>     | R | S | S | S | R | R | S | S | R | R | S | + | II  | - |
| 52 | NC | OT  | <i>S.hominis</i>     | S | I | S | S | R | R | S | S | S | S | S | + | II  | - |
| 53 | NC | MEC | <i>S.hominis</i>     | S | I | S | S | R | R | S | S | R | R | S | + | V   | - |
| 54 | H  | ED  | <i>S.hominis</i>     | S | I | S | S | R | R | S | S | R | R | S | + | A/5 | - |
| 55 | H  | OT  | <i>S.hominis</i>     | S | I | S | S | R | R | R | S | S | S | S | + | SCC | - |
| 56 | H  | TS  | <i>S.capitis</i>     | S | S | S | S | S | S | S | S | R | S | I | - | -   | - |
| 57 | H  | DM  | <i>S.cohnii</i>      | S | R | R | S | R | R | S | S | R | I | I | - | -   | - |
| 58 | H  | CM  | <i>S.epidermidis</i> | S | S | S | S | R | R | S | S | R | R | S | - | -   | - |
| 59 | NC | CM  | <i>S.epidermidis</i> | S | I | S | S | S | S | R | S | R | S | R | - | -   | - |
| 60 | NC | CM  | <i>S.epidermidis</i> | S | I | S | S | R | S | S | S | R | S | R | - | -   | - |
| 61 | NC | CM  | <i>S.epidermidis</i> | S | S | S | S | R | S | S | S | S | S | I | - | -   | - |
| 62 | H  | TS  | <i>S.epidermidis</i> | I | R | S | I | R | S | S | S | R | S | S | - | -   | - |
| 63 | H  | DM  | <i>S.epidermidis</i> | S | I | S | S | R | S | S | S | R | S | I | - | -   | - |
| 64 | H  | ED  | <i>S.epidermidis</i> | S | R | S | R | R | S | S | S | S | S | S | - | -   | - |
| 65 | H  | ED  | <i>S.epidermidis</i> | S | S | S | S | R | S | S | S | R | S | R | - | -   | - |
| 66 | H  | ED  | <i>S.epidermidis</i> | S | S | S | S | I | R | S | S | R | R | S | - | -   | - |
| 67 | H  | ED  | <i>S.epidermidis</i> | S | S | S | S | R | S | S | S | R | S | I | - | -   | - |
| 68 | H  | ER  | <i>S.epidermidis</i> | S | R | S | S | R | S | S | S | R | S | S | - | -   | - |
| 69 | H  | ER  | <i>S.epidermidis</i> | S | S | S | S | S | S | S | S | R | S | I | - | -   | - |
| 70 | H  | ER  | <i>S.epidermidis</i> | S | I | S | S | R | S | S | S | R | S | R | - | -   | - |

|    |    |    |                      |   |   |   |   |   |   |   |   |   |   |   |   |   |   |
|----|----|----|----------------------|---|---|---|---|---|---|---|---|---|---|---|---|---|---|
| 71 | NC | ER | <i>S.epidermidis</i> | S | I | S | S | I | S | S | S | S | S | S | - | - | - |
| 72 | H  | ER | <i>S.epidermidis</i> | S | R | S | S | R | S | S | S | R | S | I | - | - | - |
| 73 | NC | PT | <i>S.epidermidis</i> | S | S | S | S | I | S | S | S | R | S | R | - | - | - |
| 74 | NC | PT | <i>S.epidermidis</i> | S | S | S | S | I | S | S | S | R | S | R | - | - | - |
| 75 | NC | PT | <i>S.epidermidis</i> | S | I | S | S | S | S | S | S | R | S | I | - | - | - |
| 76 | NC | PT | <i>S.epidermidis</i> | S | S | S | S | I | S | S | S | R | S | S | - | - | - |
| 77 | NC | PT | <i>S.epidermidis</i> | S | S | S | S | I | R | S | S | R | S | S | - | - | - |
| 78 | NC | PT | <i>S.epidermidis</i> | S | R | S | S | I | S | S | S | R | S | R | - | - | - |
| 79 | NC | PT | <i>S.epidermidis</i> | S | S | S | S | R | S | S | S | R | S | S | - | - | - |
| 80 | H  | PT | <i>S.epidermidis</i> | S | S | S | S | I | S | S | S | R | S | I | - | - | - |
| 81 | NC | PT | <i>S.epidermidis</i> | S | S | S | S | S | S | S | S | R | S | S | - | - | - |
| 82 | NC | RH | <i>S.epidermidis</i> | S | S | S | S | S | S | S | S | R | R | S | - | - | - |
| 83 | NC | RH | <i>S.epidermidis</i> | S | S | S | S | I | S | S | S | S | S | S | - | - | - |
| 84 | H  | RH | <i>S.epidermidis</i> | S | I | S | S | I | R | S | S | R | S | I | - | - | - |
| 85 | H  | RH | <i>S.epidermidis</i> | S | I | S | S | S | S | R | S | R | S | S | - | - | - |
| 86 | H  | RH | <i>S.epidermidis</i> | S | S | S | S | S | S | S | S | R | S | S | - | - | - |
| 87 | NC | RH | <i>S.epidermidis</i> | S | S | S | S | R | S | S | S | S | S | I | - | - | - |
| 88 | NC | RH | <i>S.epidermidis</i> | S | S | S | S | S | S | S | S | R | R | I | - | - | - |
| 89 | NC | RH | <i>S.epidermidis</i> | S | I | S | S | R | S | S | S | R | R | R | - | - | - |
| 90 | H  | RH | <i>S.epidermidis</i> | S | I | S | S | R | S | S | S | R | R | R | - | - | - |
| 91 | H  | CM | <i>S.hominis</i>     | S | I | S | S | R | S | S | S | R | S | S | - | - | - |
| 92 | H  | ED | <i>S.hominis</i>     | S | S | S | S | R | R | S | S | R | S | S | - | - | - |
| 93 | H  | ER | <i>S.hominis</i>     | S | I | S | S | R | R | S | S | S | R | S | - | - | - |

|     |    |    |                   |   |   |   |   |   |   |   |   |   |   |   |   |   |   |
|-----|----|----|-------------------|---|---|---|---|---|---|---|---|---|---|---|---|---|---|
| 94  | H  | PT | <i>S.hominis</i>  | R | I | S | S | R | R | S | S | S | R | S | - | - | - |
| 95  | H  | PT | <i>S.hominis</i>  | R | I | S | S | R | R | S | S | S | R | S | - | - | - |
| 96  | NC | RH | <i>S.hominis</i>  | S | S | S | S | R | R | S | S | R | S | S | - | - | - |
| 97  | H  | RH | <i>S.hominis</i>  | S | S | S | S | R | R | S | S | S | S | S | - | - | - |
| 98  | H  | RH | <i>S.hominis</i>  | S | S | S | S | R | R | S | S | R | R | S | - | - | - |
| 99  | H  | RH | <i>S.hominis</i>  | S | S | S | S | R | R | S | S | R | R | S | - | - | - |
| 100 | NC | RH | <i>S.hominis</i>  | S | S | S | S | R | S | S | S | R | S | S | - | - | - |
| 101 | NC | RH | <i>S.hominis</i>  | S | S | S | S | R | S | S | S | R | S | S | - | - | - |
| 102 | H  | RH | <i>S.hominis</i>  | S | S | S | S | R | S | S | S | R | S | S | - | - | - |
| 103 | H  | RH | <i>S.pasteuri</i> | S | S | S | S | R | S | S | S | R | S | S | - | - | - |
| 104 | H  | ED | <i>S.warneri</i>  | S | I | S | S | R | S | S | S | R | S | I | - | - | - |
| 105 | H  | ER | <i>S.warneri</i>  | S | S | R | S | I | S | S | S | R | S | S | - | - | - |
| 106 | H  | DM | <i>S.warneri</i>  | S | I | S | S | R | R | S | S | R | R | I | - | - | - |
| 107 | H  | DM | <i>S.warneri</i>  | I | I | I | S | R | S | S | S | R | S | S | - | - | - |
| 108 | H  | RH | <i>S.warneri</i>  | S | I | S | S | R | S | S | S | R | S | I | - | - | - |
| 109 | H  | RH | <i>S.warneri</i>  | S | S | S | S | R | R | S | S | R | S | I | - | - | - |

Note: CM: Chinese medicine department, DM: dermatology department, ED: endocrine department, ER: emergency room, IM: ultrasonic department, MEC: 2  
medical examine centre, OT: orthopaedics department, PT: proctology department, RH: rehabilitation department, TS: thoracic surgery department; \* new 3  
MLST type; C: chloramphenicol, CD: clindamycin, CN: gentamicin, CPT: ceftaroline, E: erythromycin, FOX: cefoxitin, LEV: levofloxacin, LZD: linezolid, 4  
PG: penicillin, T: tetracycline, TEC: teicoplanin 5
